# Supplementary material for: Lasiodiplodia iraniensis and Diaporthe spp. Are Associated with Twig Dieback and Fruit Stem-End Rot of Sweet Orange, Citrus sinensis, in Florida
Source: MDPI journal article supplement (doi:10.3390/horticulturae10040406), 2024-04-17
Supplement: s1 [file s1]

**Table S1.** Collection details and of isolates of this study.

| Specie                            | Sample   | Location                         | Tissue  |
|-----------------------------------|----------|----------------------------------|---------|
| <i>Diaporthe pseudomangiferae</i> | CVG 2045 | St. Lucie County School District | Fruit   |
|                                   | CVG 2046 | St. Lucie County School District | Twig    |
| <i>Diaporthe ueckerae</i>         | CVG 1937 | St. Lucie County School District | Fruit   |
|                                   | CVG 1938 | St. Lucie County School District | Twig    |
|                                   | CVG 1905 | Groves                           | Fruit   |
|                                   | CVG 1906 | Groves                           | Fruit   |
|                                   | CVG 1929 | Sebring                          | Twig    |
|                                   | CVG 1930 | Sebring                          | Twig    |
|                                   | CVG 1944 | Lakeland                         | Twig    |
|                                   | CVG 1945 | Lakeland                         | Twig    |
|                                   | CVG 1957 | Lakeland                         | Twig    |
|                                   | CVG 1979 | Osceola County                   | Twig    |
|                                   | CVG 1980 | Osceola County                   | Twig    |
|                                   | CVG 1987 | Lakeland                         | Twig    |
|                                   | CVG 1988 | Osceola County                   | Twig    |
|                                   | CVG 1996 | Sebring                          | Sebring |
|                                   | CVG 2001 | Lake Wales                       | Twig    |
| <i>Lasiodiplodia iranienesis</i>  | CVG 2002 | Lake Wales                       | Twig    |
|                                   | CVG 2048 | St. Lucie County School District | Twig    |
|                                   | CVG 2049 | St. Lucie County School District | Twig    |
|                                   | CVG 2155 | Lake Wales                       | Fruit   |
|                                   | CVG 2156 | Lake Wales                       | Fruit   |
|                                   | CVG 2160 | Sebring                          | Fruit   |
|                                   | CVG 2161 | Sebring                          | Fruit   |
|                                   | CVG 2166 | Sebring                          | Fruit   |
